# Supplementary material for: Optimization of ultrasonic-assisted extraction of pigment from Dioscorea cirrhosa by response surface methodology and evaluation of its stability
Source: Royal Society of Chemistry journal article supplement (doi:10.1039/c8ra07455k), 2019-01-01
Supplement: c8ra07455k1.pdf [file c8ra07455k1.pdf]

## Supporting Information

### Optimization of ultrasonic-assisted extraction of pigment from *Dioscorea*

#### *Cirrrosa* by response surface methodology and evaluation of its stability

Manli Zhong <sup>†a</sup>, Shiya Huang <sup>†a</sup>, Huanhuan Wang <sup>a</sup>, Yuelong Huang <sup>b</sup>, Jianren Xu <sup>b</sup>, Lijuan Zhang <sup>a,\*</sup>

<sup>a</sup> *School of Chemistry and Chemical Engineering, South China University of Technology, Guangzhou 510640, China*

<sup>b</sup> *Guangzhou Jiao Zi Daily Chemical Co., Ltd., Guangzhou 510315, China*

<sup>†</sup> *These authors contributed equally to the work.*

\* Corresponding author.

Lijuan Zhang: [celjzh@scut.edu.cn](mailto:celjzh@scut.edu.cn)

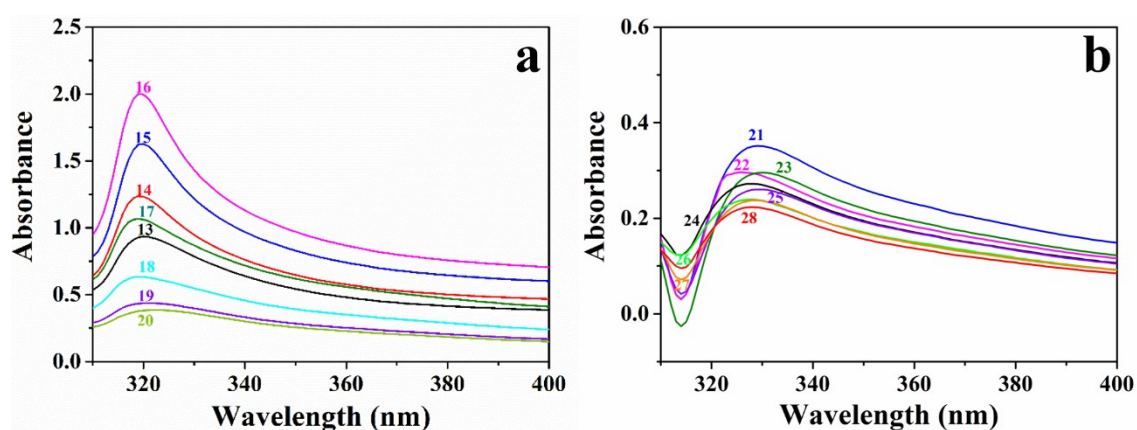

Fig. S1. UV spectra of purified DCP  
(a) UV spectra of component 1, (b) UV spectra of component 2
